# Supplementary material for: How do network meta-analyses address intransitivity when assessing certainty of evidence: a systematic survey
Source: HighWire-hosted journal article supplement (doi:10.1136/bmjopen-2023-075212), 2023-11-01
Supplement: bmjopen-2023-075212supp005_data_supplement.pdf [file bmjopen-2023-075212supp005_data_supplement.pdf]

Appendix 5.

Relationship between publication year and rating down for intransitivity

| Publication year | Systematic reviews that rated down for intransitivity for at least one comparison | Systematic reviews that did not rate down for intransitivity for any comparison | Total number of systematic reviews |
|------------------|-----------------------------------------------------------------------------------|---------------------------------------------------------------------------------|------------------------------------|
| 2015             | 1 (20.0%)                                                                         | 4 (80.0%)                                                                       | 5                                  |
| 2016             | 4 (26.7%)                                                                         | 11 (73.3%)                                                                      | 15                                 |
| 2017             | 5 (29.4%)                                                                         | 12 (70.6%)                                                                      | 17                                 |
| 2018             | 6 (30.0%)                                                                         | 14 (70.0%)                                                                      | 20                                 |
| 2019             | 7 (26.9%)                                                                         | 19 (73.1%)                                                                      | 26                                 |
| 2020             | 8 (21.6%)                                                                         | 29 (78.4%)                                                                      | 37                                 |
| 2021             | 11 (13.6%)                                                                        | 70 (86.4%)                                                                      | 81                                 |
| 2022             | 10 (14.9%)                                                                        | 57 (85.1%)                                                                      | 67                                 |
